# Supplementary material for: S14G-Humanin ameliorates ovalbumin-induced airway inflammation in asthma mediated by inhibition of toll-like receptor 4 (TLR4) expression and the nuclear factor κ-B (NF-κB)/early growth response protein-1 (Egr-1) pathway
Source: Aging (Albany NY). 2023 Jul 14;15(14):6822–33. doi: 10.18632/aging.204874 (PMC10415557; doi:10.18632/aging.204874)
Supplement: Supplementary Figures [file aging-15-204874-s001.pdf]

SUPPLEMENTARY FIGURES

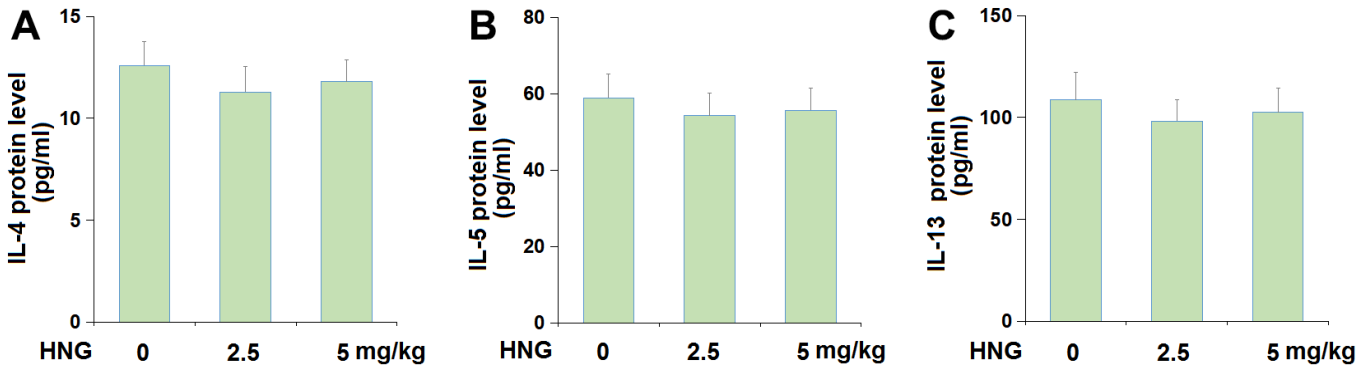

Supplementary Figure 1. S14G-Humanin (HNG) alone has no significant effect on the expression of the Th2 cytokines interleukin-4 (IL-4), interleukin-5 (IL-5), and interleukin-13 (IL-13) from bronchoalveolar lavage (BAL) fluid. (A) IL-4; (B) IL-5; (C) IL-13 in the BAL fluid.

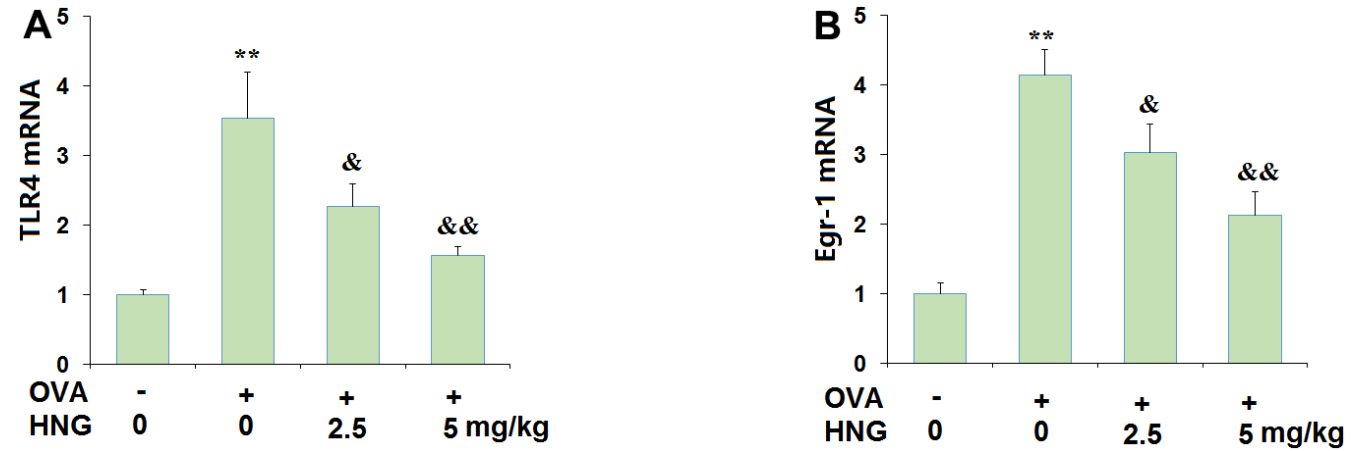

Supplementary Figure 2. S14G-Humanin (HNG) reduced the expression of toll-like receptor 4 (TLR4) and early growth response-1 (Egr-1). (A) mRNA of TLR4; (B) mRNA of Egr-1 (\*\*,  $P<0.01$  vs. vehicle group; &, &&,  $P<0.05$ ,  $0.01$  vs. asthma models).
